# Supplementary material for: SULF1 suppresses Wnt3A-driven growth of bone metastatic prostate cancer in perlecan-modified 3D cancer-stroma-macrophage triculture models
Source: PubMed Central journal article supplement (PMC7228113; doi:10.1371/journal.pone.0230354), 2020-05-15

**A**

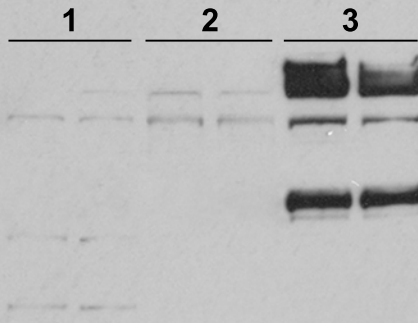

250  
150  
100  
75  
  
50  
  
37  
25  
20  
15

**B**

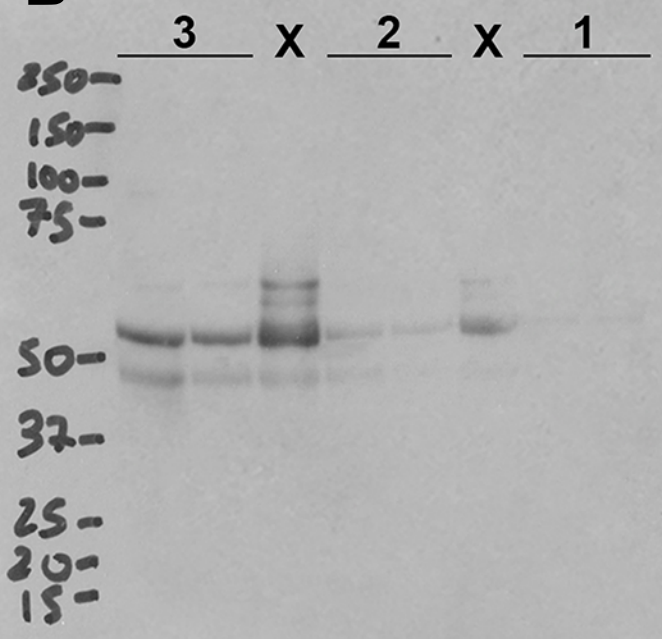

**C**

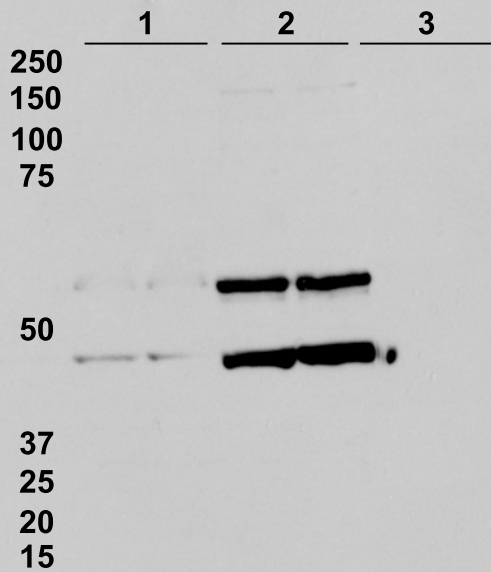

**D**123

X

X

250  
150  
100  
75  
50  
37  
25  
20  
15

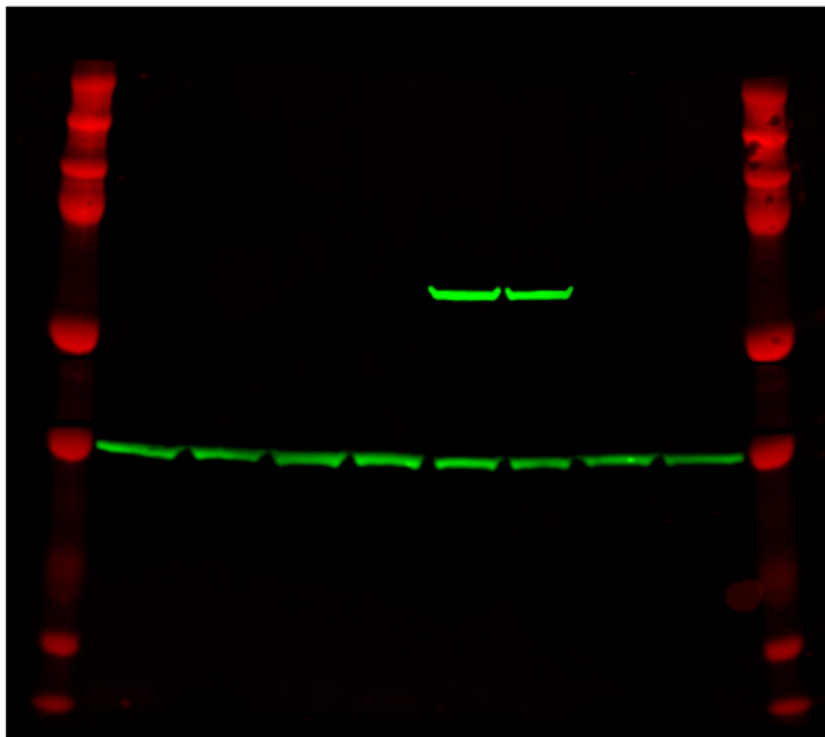



**E**123

X

X

250

150

100

75

50

37

25

20

15

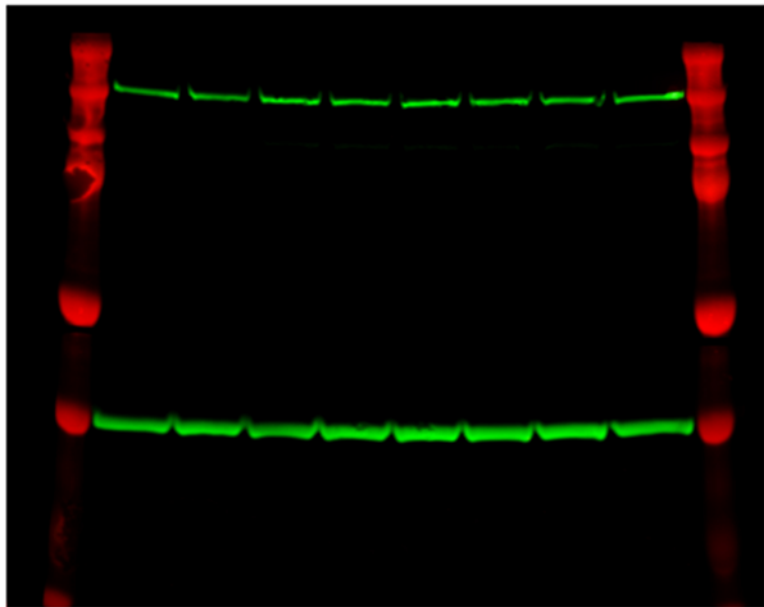

**F****X X****1****2****3****250****150****100****75****50****37****25****20****15**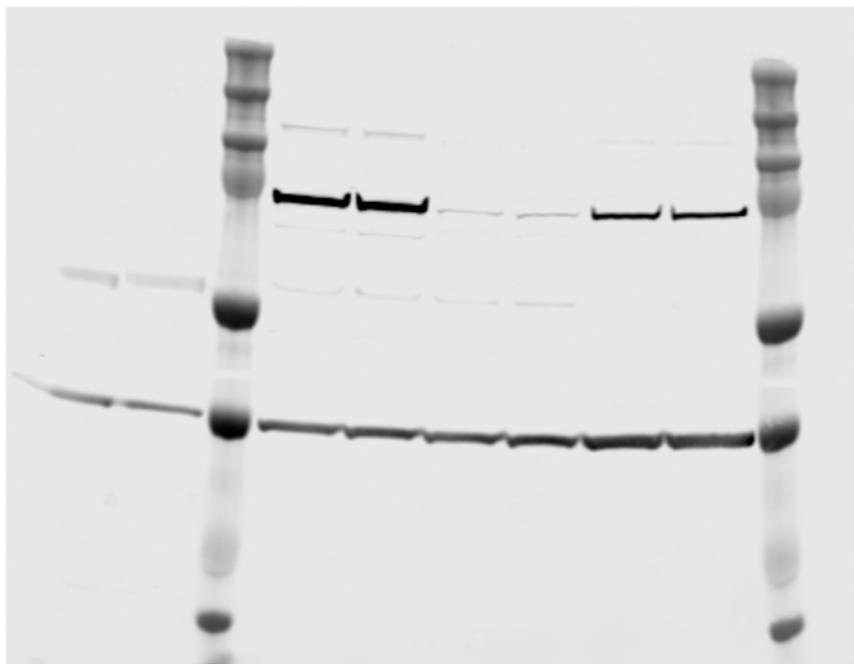

Supplement: pone.0230354.s013.pdf [file pone.0230354.s013.pdf]
